# Supplementary material for: Unique Evolution Patterns of Hepatitis B and C Viruses Revealed by Continuous Genetic Surveillance from 2015 to 2021 in Gabon, Central Africa
Source: Preprints.org preprint supplement (doi:10.20944/preprints202307.1265.v1), 2023-07-19
Supplement: Supplementary file 3 [file supplementary]

**Supplementary Materials**

**Table S1.** Primer sequences used in this study.

| Name | Sequence |
| --- | --- |
| HBV qPCR | |
| HBV-qPCR_Fw | CCGTCTGTGCCTTCTCATCTG |
| HBV-qPCR_Rv | AGTCCAAGAGTYCTCTTATGYAAGACCTT |
| HBV-qPCR_Probe | CCGTGTGCACTTCGCTTCACCTCTGC |
| HCV qPCR | |
| HCV-qPCR_Fw | TGCTAGCCGAGTAGYGTTGG |
| HCV-qPCR_Rv | ACTCGCAAGCACCCTATCAG |
| HCV-qPCR_Probe | ACCACAAGGCCTTTCGCRAC |
| HBV genotyping | |
| HBV_GT_Fw1 | GGGTCACCATATTCTTGGG |
| HBV_GT_Rv1 | CCAAAGACAAAAGAAAATTGGTAAC |
| HBV_GT_Fw2 | GAACAAGAGCTACAKCATGGG |
| HBV_GT_Rv2 | CGGTAWAAAGGGACTCAAGATG |
| HCV genotyping | |
| HCV_GT_Fw | TATGAYACCCGCTGYTTTGACTC |
| HCV_GT_Rv | GTAYCTCGTCATAGCYTCCGTGAA |
| HBV whole-genome sequencing | |
| HBV_WG1_Fw1 | GTGCACTTCGCTTCACCTCT |
| HBV_WG1_Rv | CCACCTTRTGAGTCCAAGGA |
| HBV_WG1_Fw2 | CTTGAGGCYTACTTCAAAGACTGTG |
| HBV_WG2_Fw1 | GCTCACCTCACCATACAGCA |
| HBV_WG2_Rv | GAATGCAGGGTCCAACTGAT |
| HBV_WG2_Fw2 | GCTCWCCTCACCATACAGCA |
| HBV_WG3_Fw1 | TCCTGTCCTCCAATTTGTCC |
| HBV_WG3_Rv | GCCTGAGTGCTGTATGGTGA |
| HBV_WG3_Fw2 | TCAGTGGTTCGTAGGGCTTT |

**Table S2.** HBV strains showing high nucleotide identity to HBV-A3, HBV-A1, and HBV-E strains detected in this study.

| HBV-A3: SYMAV-D0231 | | | | | |
| --- | --- | --- | --- | --- | --- |
| # | Description | E value | Identity % | Country | Accession no. |
| 1 | HBV isolate O64 | 0 | 98.98% | Gabon | AM184125 |
| 2 | HBV isolate N35 | 0 | 98.82% | Gabon | AM184126 |
| 3 | HBV strain FE-929-MO | 0 | 97.98% | Gabon | EU054331 |
| HBV-A1: SYMAV-H0721 | | | | | |
| 1 | HBV isolate A1-SA | 0 | 98.83% | South Africa | KP234050 |
| 2 | HBV isolate 833 | 0 | 98.55% | South Africa | AY233289 |
| 3 | HBV isolate rw14-48 | 0 | 98.51% | Rwanda | MK512473 |
| HBV-E: SYMAV-H0235 | | | | | |
| 1 | HBV isolate Eafr | 0 | 95.16% | Guinea | KX186584 |
| 2 | HBV isolate GU1214 | 0 | 94.91% | Guinea | GQ161816 |
| 3 | HBV isolate CAR039 | 0 | 94.91% | CAR | AM494693 |
